# Supplementary material for: Measuring forces at the leading edge: a force assay for cell motility
Source: Royal Society of Chemistry journal article supplement (doi:10.1039/c2ib20097j), 2012-10-05
Supplement: c2ib20097j_5.pdf [file c2ib20097j_5.pdf]

Movie S3. - Two Tubes from Mast Cell of Mouse  
(Cytochalsin E - 40  $\mu\text{m}$  length)

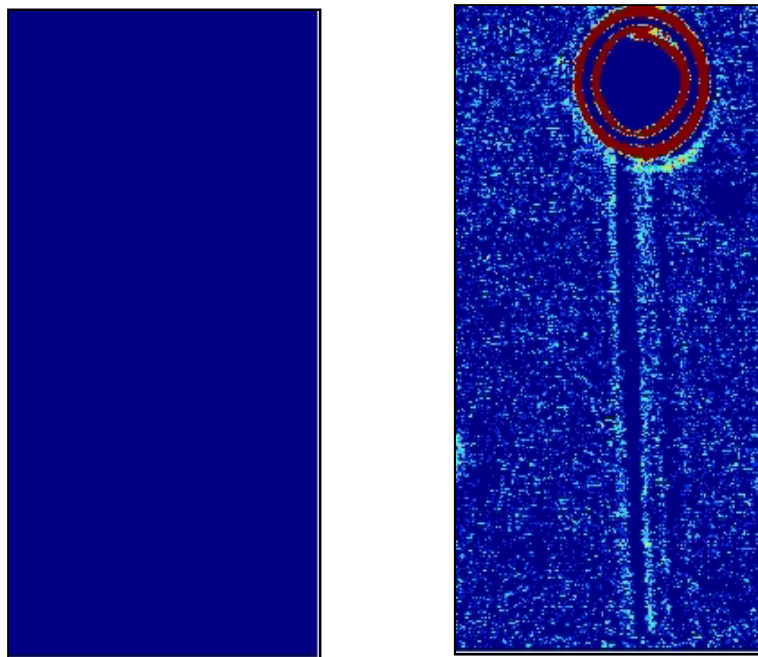

Movie S3. Two 40  $\mu\text{m}$  micron tubes formed from mast cell of mouse in presence of cytochalasin E. Left panel: Relaxation, 25.0 s of data shown at 6 fps (25 x 6 frames). Right panel: Tube pull-back towards the cell when the optical trap was removed, 23.6 s of data shown at 6 fps (23.6 x 6 frames). Dimensions of image in movies are 13.8 by 28.6  $\mu\text{m}$ .
