# Supplementary material for: Measuring forces at the leading edge: a force assay for cell motility
Source: Royal Society of Chemistry journal article supplement (doi:10.1039/c2ib20097j), 2012-10-05
Supplement: c2ib20097j_6.pdf [file c2ib20097j_6.pdf]

### Movie S4. Tubes Pull-back Upon Removing Trap

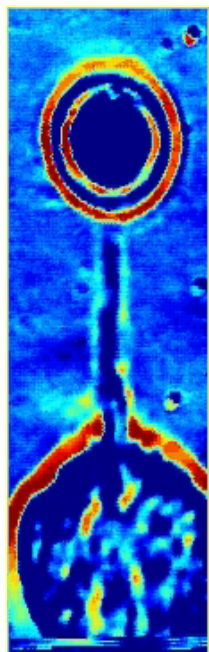

15  $\mu\text{m}$  length (20 fps)

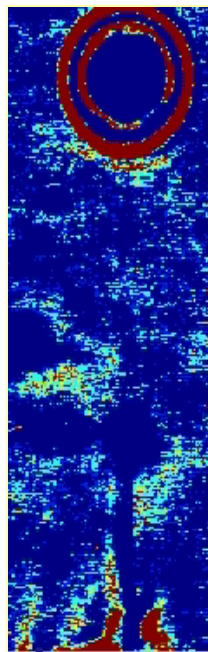

25  $\mu\text{m}$  length (20 fps)

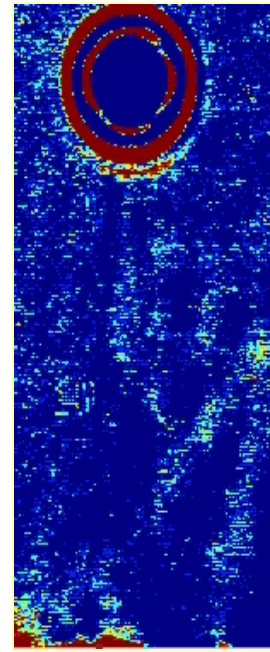

25  $\mu\text{m}$  length (20 fps)

Movie S4. Movie showing tubes pull back towards cell upon removing trap under control conditions. First panel: One tube 15  $\mu\text{m}$  long, 70 s of data. Dimensions of images in movie are 9 by 28.7  $\mu\text{m}$ . Second panel: One 25  $\mu\text{m}$  tube, 70 s of data. Dimensions of images in movie are 9.4 by 28.7  $\mu\text{m}$ . Third panel: Two tubes 25  $\mu\text{m}$  long, 60 s of data. Dimensions of images in movie are 12.6 by 28.8  $\mu\text{m}$ .
